# Supplementary material
Source: PubMed Central journal article supplement (PMC3951512)
Supplement: NIHMS559336-supplement-Supplemental_Material.pdf [file NIHMS559336-supplement-Supplemental_Material.pdf]

## SUPPLEMENTAL MATERIAL

### SUPPLEMENTAL FIGURE LEGENDS

**Figure SI. 2-CIHA induces apoptosis of RAW 264.7 macrophages.** A. Cells were treated with indicated concentrations of HA or 2-CIPA for 24h, and the apoptotic cells were determined under fluorescent microscopy after TUNNEL staining. B. Caspase 3 activity in cells treated with indicated concentrations of HA or 2-CIHA for 24h. N=3. \*P<0.05 and \*\*P<0.01 vs. Blank.

**Figure SII. 2-CIHA induces mRNA expression of ER stress-associated proteins.** THP-1 cells (A) or RAW 264.7 cells (B) were treated with 50  $\mu$ M of HA or 2-CIHA for 18h, and the mRNA levels of indicated proteins were determined by qRT-PCR. N=3. \*\*P<0.01.

**Figure SIII. 2-CIHA induces XBP1 mRNA splicing in RAW 264.7 cells.** Cells were treated with 50  $\mu$ M of HA or 2-CIHA for 18h, and XBP1 mRNA splicing was determined by qRT-PCR.

Table SI. Primer sequences

| Gene                     | Forward                           | Reverse                 | Genebank ID    |
|--------------------------|-----------------------------------|-------------------------|----------------|
| Human ATF3 <sup>1</sup>  | GCCATCCAGAACAAGCACCT              | GGCTACCTCGGCTTTTGTGAT   | NM_001674      |
| Human CHOP               | TTGACCCCTGCTTCTCTGGCTT            | GCTCTGGGAGGTGCTTGTA     | NM_001195056.1 |
| Human GAPDH              | CACTCCTCCACCTTTGACGCT             | CCTGTTGCTGTAGCCAAATTCGT | NM_002046      |
| Human GRP78              | ATCACGCCGTCCTATGTCG               | TTGGCGTCAAAGACCGTGT     | NM_005347      |
| Human XBP1 <sup>1</sup>  | GGGAATGAAGTGAGGCCAGT              | TGAAGAGTCAATACCGCCAGA   | NM_005080      |
| Mouse ATF3               | CCTCCTGGGTCACTGGTATTTG            | AGGGGTCTGTTGTTGACGGTAA  | NM_007498.3    |
| Mouse $\beta$ -Actin     | CCAGCCTTCCTTCTGGGTAT <sup>a</sup> | GAGGTCTTTACGGATGTCAACGT | NM_007393      |
|                          | ACCTTCTACAATGAGCTGCG <sup>b</sup> | CTGGATGGCTACGTACATGG    |                |
| Mouse CHOP <sup>2</sup>  | GGCATCACCTCCTGTCTGTC              | CTACCTCAGTCCCCTCTC      | NM_007837      |
| Mouse GRP78 <sup>3</sup> | ACCTATTCCTGCGTCGGTGT              | GCATCGAAGACCGTGTCTC     | NM_001163434   |
| Mouse XBP1 <sup>2</sup>  | GAACCAGGAGTTAAGAACACG             | AGGCAACAGTGCAGAGTCC     | NM_013842      |

<sup>a</sup>for realtime PCR. <sup>b</sup>for XBP1.

### REFERENCES

1. Galluzzi L, De Santi M, Crinelli R, De Marco C, Zaffaroni N, Duranti A, Brandi G, Magnani M. Induction of endoplasmic reticulum stress response by the indole-3-carbinol cyclic tetrameric derivative ctet in human breast cancer cell lines.

*PLoS One*. 2012;7:e43249

2. Son SH, Goo YH, Chang BH, Paul A. Perilipin 2 (plin2)-deficiency does not increase cholesterol-induced toxicity in macrophages. *PLoS One*. 2012;7:e33063
3. Hosogai N, Fukuhara A, Oshima K, Miyata Y, Tanaka S, Segawa K, Furukawa S, Tochino Y, Komuro R, Matsuda M, Shimomura I. Adipose tissue hypoxia in obesity and its impact on adipocytokine dysregulation. *Diabetes*. 2007;56:901-911

**A**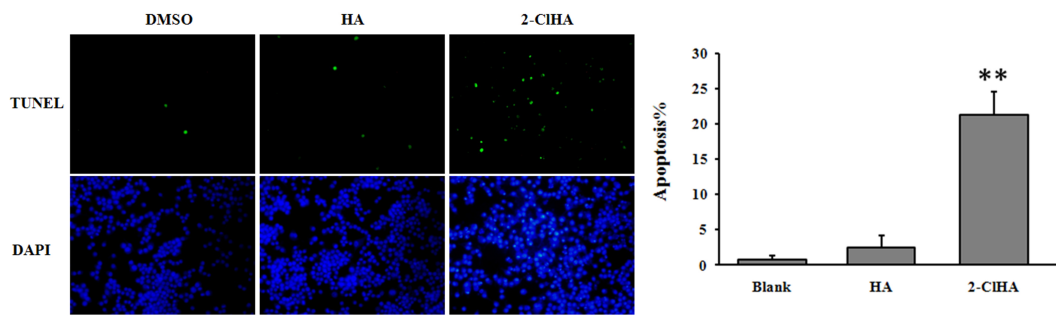**B**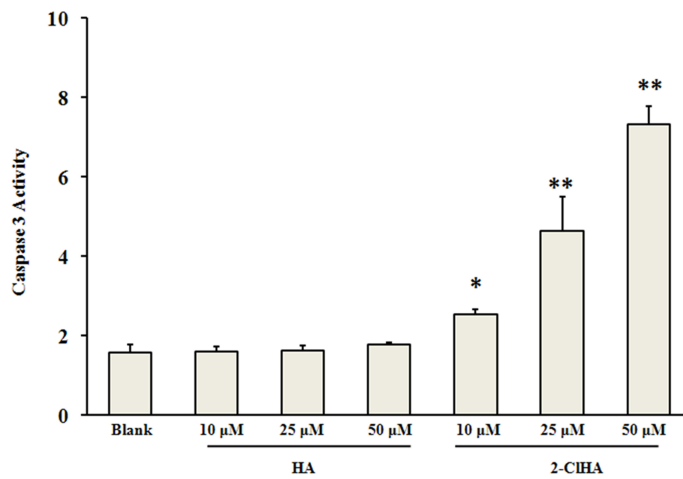

**Figure S1. 2-CIHA induces apoptosis of RAW 264.7 macrophages.** A. Cells were treated with indicated concentrations of HA or 2-CIPA for 24h, and the apoptotic cells were determined under fluorescent microscopy after TUNNEL staining. B. Caspase 3 activity in cells treated with indicated concentrations of HA or 2-CIHA for 24h. N=3. \*P<0.05 and \*\*P<0.01 vs. Blank.

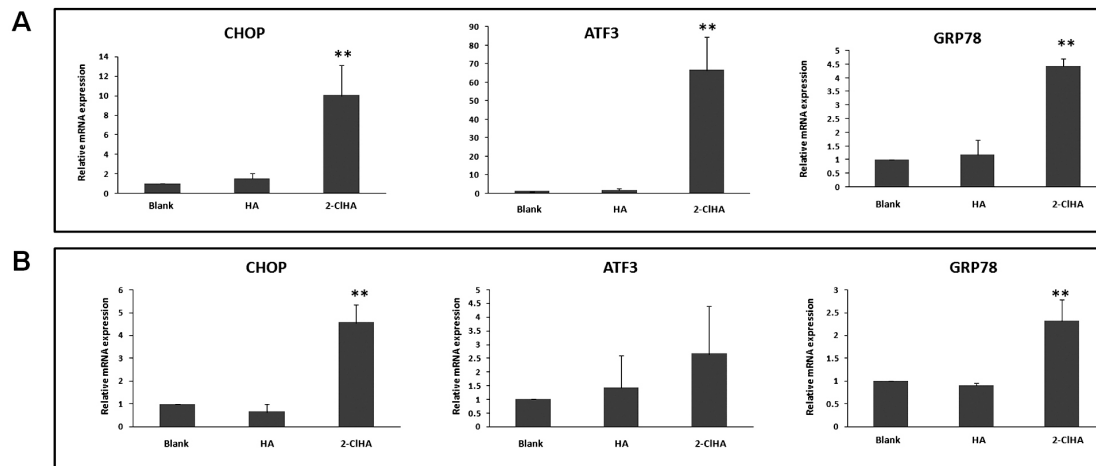

**Figure SII. 2-CIHA induces mRNA expression of ER stress-associated proteins.** THP-1 cells (A) or RAW 264.7 cells (B) were treated with 50  $\mu$ M of HA or 2-CIHA for 18h, and the mRNA levels of indicated proteins were determined by qRT-PCR. N=3. \*\*P<0.01.

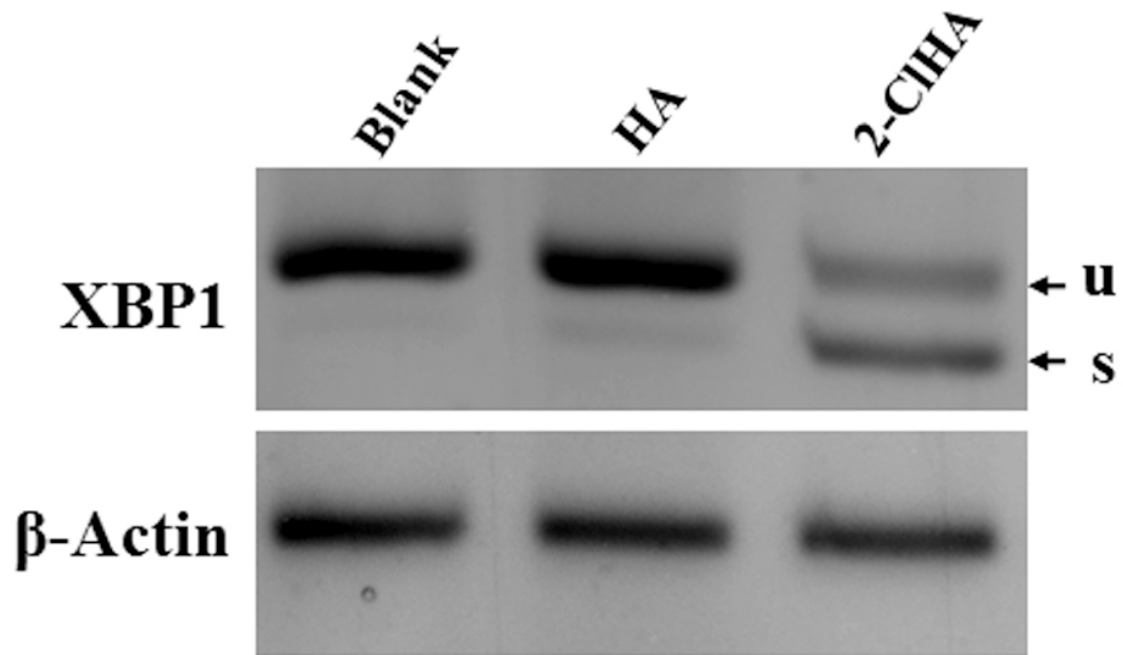

**Figure SIII. 2-CIHA induces XBP1 mRNA splicing in RAW 264.7 cells.** Cells were treated with 50  $\mu$ M of HA or 2-CIHA for 18h, and XBP1 mRNA splicing was determined by qRT-PCR.
